# Supplementary material
Source: Springer Nature journal article supplement (https://www.springermedizin.de/resource/supplementary/12969_2008_362_MOESM3_ESM.pdf/9592914)

A

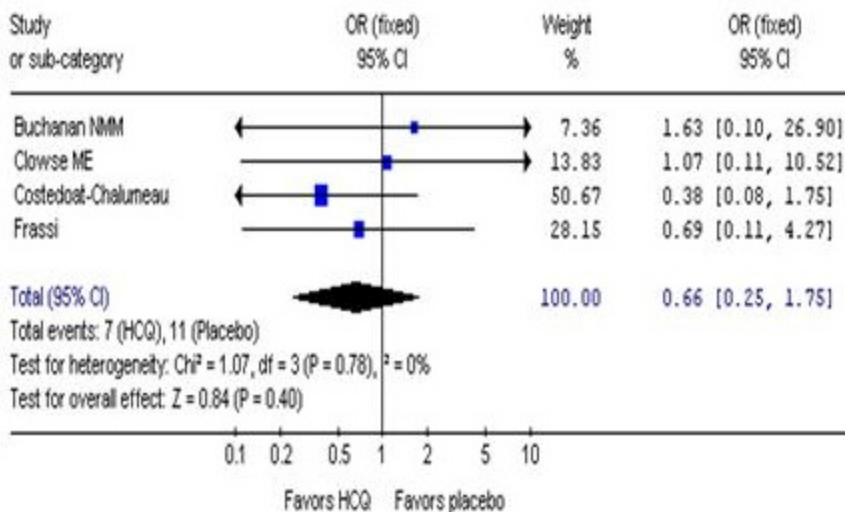

B

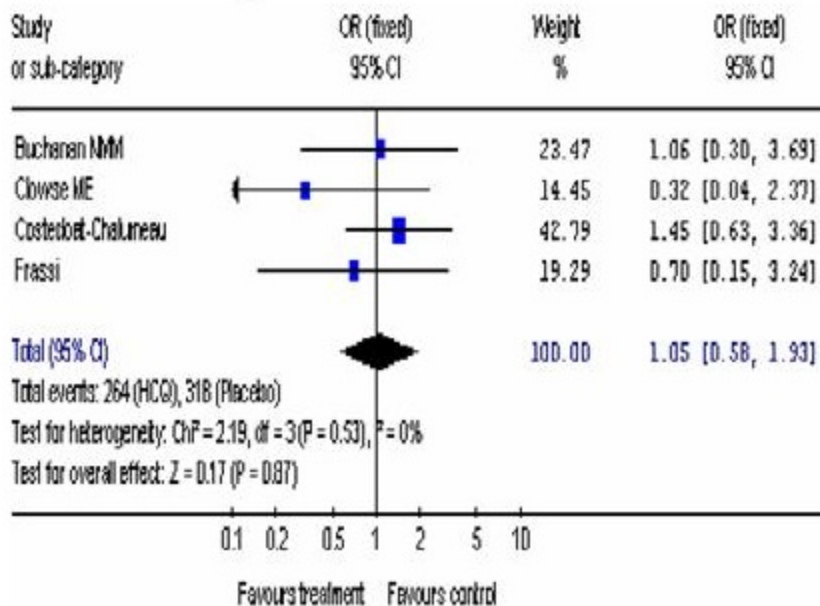

Supplement: MOESM3 [file 9592914]
